# Supplementary material for: Impact of Borna Disease Virus Infection on the Transcriptome of Differentiated Neuronal Cells and Its Modulation by Antiviral Treatment
Source: MDPI journal article supplement (doi:10.3390/v15040942), 2023-04-10
Supplement: s1 [file s1]

**Table S1.** List of primers and probes used in this study.

| Primer                                              | Sequence 5'to3'                        | Description                              |
|-----------------------------------------------------|----------------------------------------|------------------------------------------|
| NCAM2-F                                             | CTTATGTCTGCAGGGCCACA                   | Real-time RT-qPCR                        |
| NCAM2-R                                             | TGCTGCCCTTTGACTTCGAT                   | Real-time RT-qPCR                        |
| RARA-F                                              | CATTGAGACCCAGAGCAGCA                   | Real-time RT-qPCR                        |
| RARA-R                                              | CCGGGTCACCTTGTTGATGA                   | Real-time RT-qPCR                        |
| RARB-F                                              | GCACCAGGTATACCCAGCA                    | Real-time RT-qPCR                        |
| RARB-R                                              | GTCCGTTCTCAAGGTCCTG                    | Real-time RT-qPCR                        |
| RARG-F                                              | CAAGGTGACCAGGAATCGCT                   | Real-time RT-qPCR                        |
| RARG-R                                              | GTCTCCTGATGGGCTTTGCT                   | Real-time RT-qPCR                        |
| MGP-F                                               | GCCGCTTAGCGGTAGTAAC                    | Real-time RT-qPCR                        |
| MGP-R                                               | AGCGTTCTCGGATCCTCTCT                   | Real-time RT-qPCR                        |
| HGF-F                                               | ACCCTGGTGTTCACAAGCA                    | Real-time RT-qPCR                        |
| HGF-R                                               | GCAAGAATTTGTGCCGGTGT                   | Real-time RT-qPCR                        |
| S100A16-F                                           | GCAGTCATTGTCCTGGTGGA                   | Real-time RT-qPCR                        |
| S100A16-R                                           | GATGAGCTTATCCGCAGCCT                   | Real-time RT-qPCR                        |
| NPC2-F                                              | CTGGCAGCTACATTCTGCT                    | Real-time RT-qPCR                        |
| NPC2-R                                              | CACGGCCTTGCTGCTTTTAG                   | Real-time RT-qPCR                        |
| ITGA1-F                                             | GGCAGCACAATTCATGCACA                   | Real-time RT-qPCR                        |
| ITGA1-R                                             | AAATGTACACAGCTCCCCCG                   | Real-time RT-qPCR                        |
| FLNB-F                                              | GGAGTTGCTCGTGGAAGACA                   | Real-time RT-qPCR                        |
| FLNB-R                                              | CCTGCAGCTTTGGTGTC AAC                  | Real-time RT-qPCR                        |
| TGM2-F                                              | GGCGAACCACTGAACAAAC                    | Real-time RT-qPCR                        |
| TGM2-R                                              | CAGGTACTTGGTGCCACACT                   | Real-time RT-qPCR                        |
| IGFBP6-F                                            | AACCGCAGAGACCAACAGAG                   | Real-time RT-qPCR                        |
| IGFBP6-R                                            | TGGTCACAATTGGGCACGTA                   | Real-time RT-qPCR                        |
| PLAT-F                                              | TACAGCCAGCCTCAGTTTCG                   | Real-time RT-qPCR                        |
| PLAT-R                                              | TTCTGCCCAAGATCACCGTC                   | Real-time RT-qPCR                        |
| PLS3-F                                              | ACTCTGCTTCTGCCATTGGG                   | Real-time RT-qPCR                        |
| PLS3-R                                              | TCGGAGTAAAGCAGCCAAGG                   | Real-time RT-qPCR                        |
| Primer                                              | Sequence 5'to3'                        | Description                              |
| TMSB4X-F                                            | CTTCGCTTTTCTCCGCAAC                    | Real-time RT-qPCR                        |
| TMSB4X-R                                            | ATTTCAGTGTCTGCCACCC                    | Real-time RT-qPCR                        |
| IFITM2-F                                            | AGCAGGAAGTGGCTATGCTG                   | Real-time RT-qPCR                        |
| IFITM2-R                                            | CACGGAGTACGGAATGCTA                    | Real-time RT-qPCR                        |
| TNFRSF12A-F                                         | CGGACCTGGACAAGTGCAT                    | Real-time RT-qPCR                        |
| TNFRSF12A-R                                         | GTCTCTCTATGGGGGTGGT                    | Real-time RT-qPCR                        |
| GAPDH-F                                             | AGCGAGATCCCTCCAAAATC                   | Real-time RT-qPCR                        |
| GAPDH-R                                             | AAATGAGCCCCAGCCTTCTC                   | Real-time RT-qPCR                        |
| BoDV-1 PmRNA/gRNA probe                             | FAM-AGAACCCCTCCATGATCTCAGACCCAGA-TAMRA | Real-time RT-qPCR (Hayashi et al., 2009) |
| BoDV-1 gRNA-specific RT primer for huP2Br strain    | TGTTGCGCTAACAACAAACCAATCAC             | Real-time RT-qPCR (Hayashi et al., 2009) |
| BoDV-1 P mRNA/gRNA-forward primer for huP2Br strain | ATGCATTGACCCAACCAAGTC                  | Real-time RT-qPCR                        |
| BoDV-1 P mRNA/gRNA-reverse primer for huP2Br strain | ATCATTCGACAGCTGCTCCCTTC                | Real-time RT-qPCR                        |
| BoDV-1 N-forward primer (OU277)                     | GGAGCCGAGCAGATCAAGAA                   | Real-time RT-qPCR                        |
| BoDV-1 N-reverse primer (OU278)                     | CACAAAGGAGCCTACCCAGG                   | Real-time RT-qPCR                        |
| BoDV-1 L probe                                      | FAM-CGAGGCATCCGTGGTCAGCAGAT-TAMRA      | Real-time RT-qPCR                        |
| BoDV-1 L-forward                                    | GGAAGCGCCCCGTGTT                       | Real-time RT-qPCR                        |
| BoDV-1 L-reverse primer (OU283)                     | CCCCCAGAGTGATTCGCTTA                   | Real-time RT-qPCR                        |

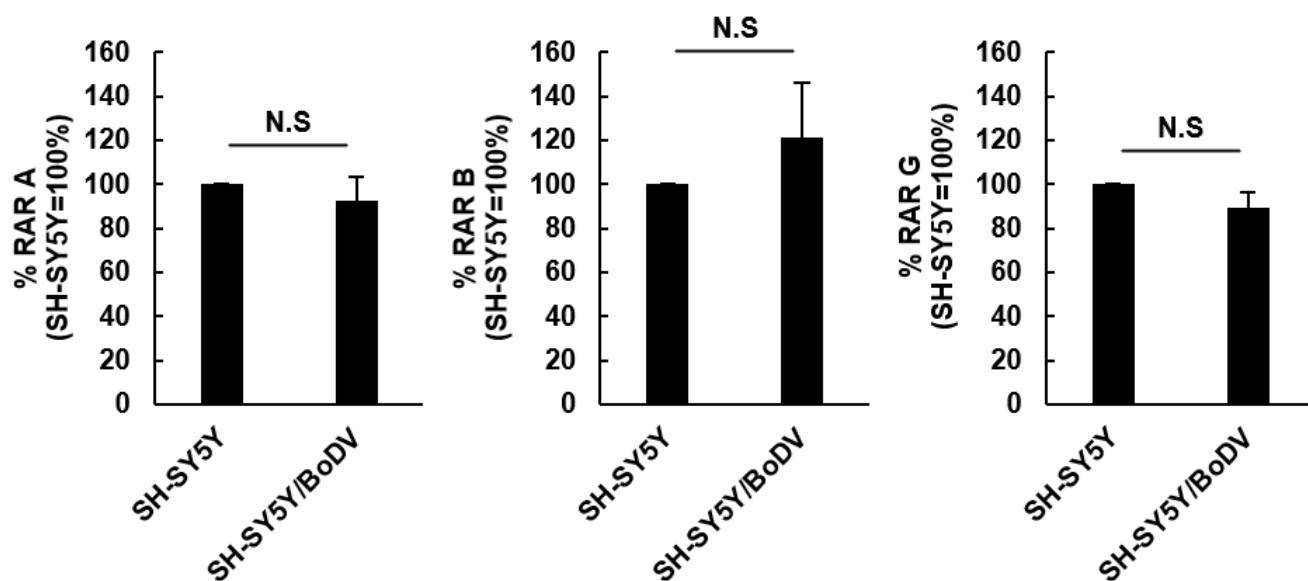

**Figure S1.** Comparable expression of receptors for RA in SH-SY5Y and SH-SY5Y/BoDV cells. The mRNA amounts of the RA receptors were evaluated by real-time RT-qPCR. We calculated the expression of each gene by the DDCT method. The expression of each gene was normalized with that of the *GAPDH* gene in each condition. Values are expressed as the mean percentage + standard error of mean (SEM) of three independent experiments. N.S, non-significant.

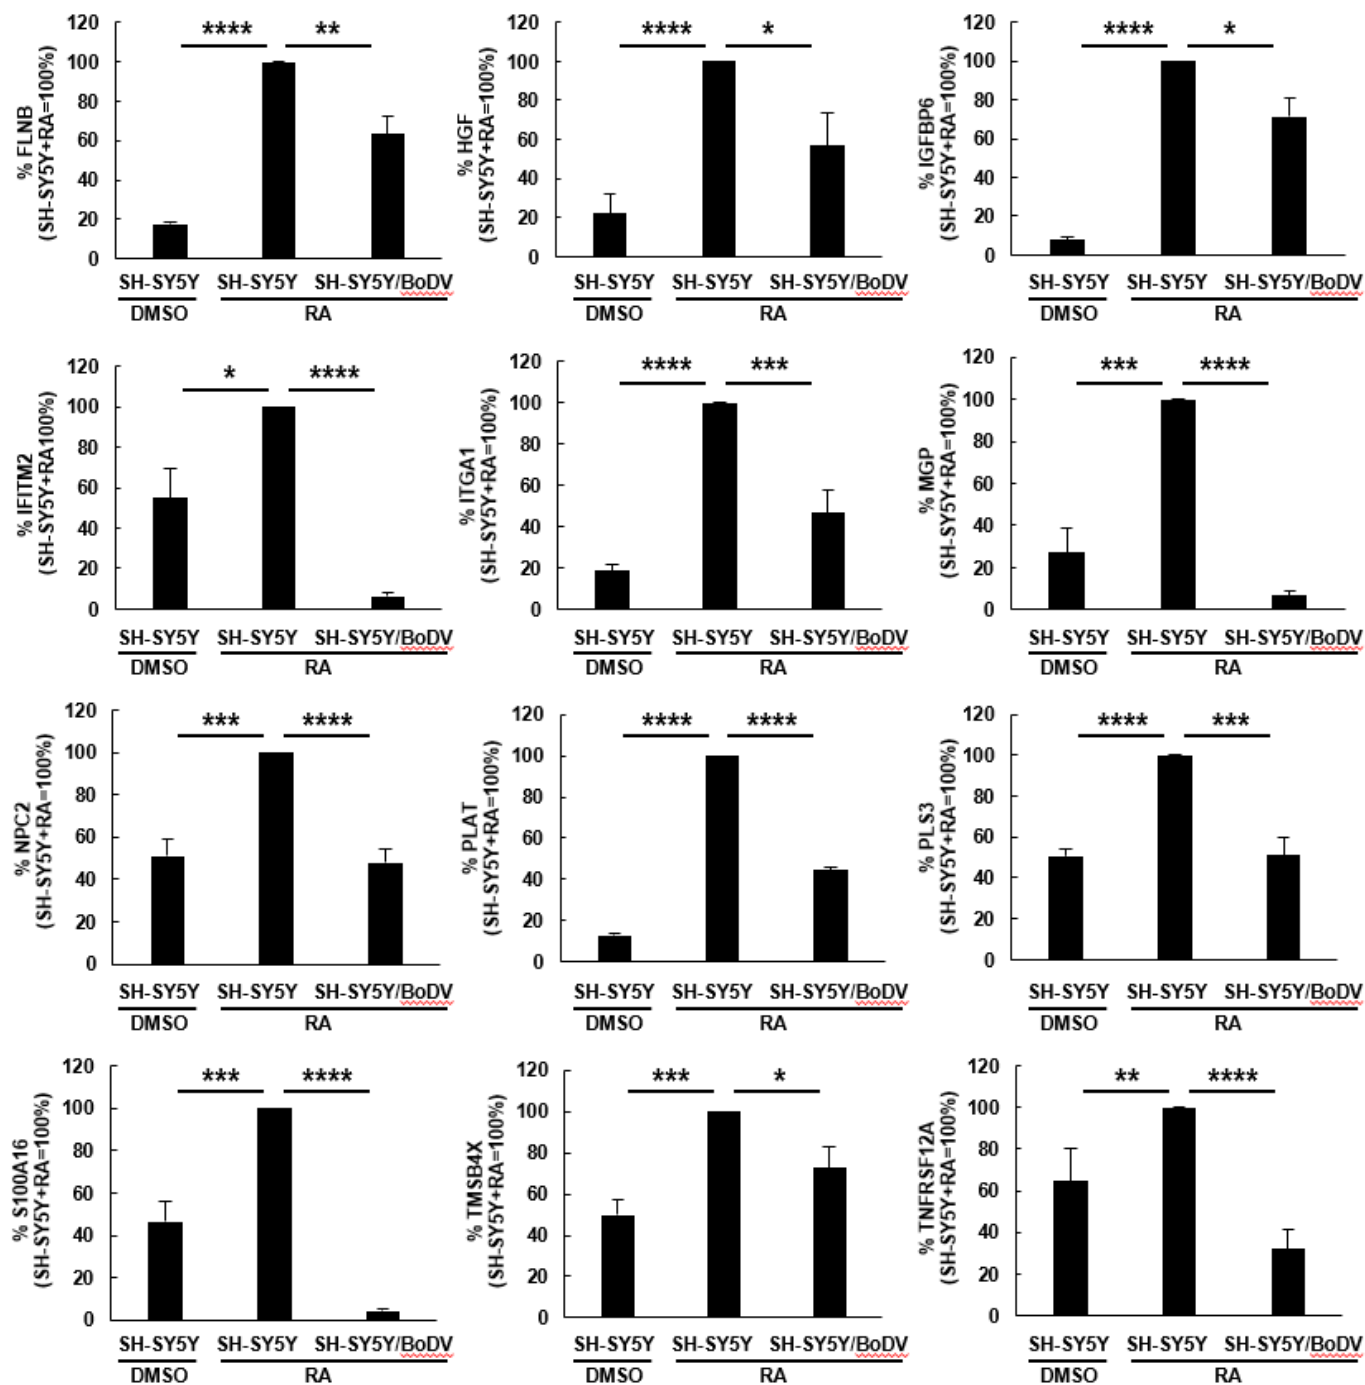

**Figure S2.** Confirmation of RNA-seq results using real-time RT-qPCR analyses. The mRNA amounts of differentiation-related genes that were downregulated by BoDV-1 infection in our RNA-seq analysis were evaluated by real-time RT-qPCR. We calculated the expression of each gene by the DDCT method. The expression of each gene was normalized with that of the *GAPDH* gene in each condition. Values are expressed as the mean percentage  $\pm$  SEM of at least three independent experiments. \*,  $P < 0.05$ ; \*\*,  $P < 0.01$ ; \*\*\*,  $P < 0.005$ ; \*\*\*\*,  $P < 0.001$ .

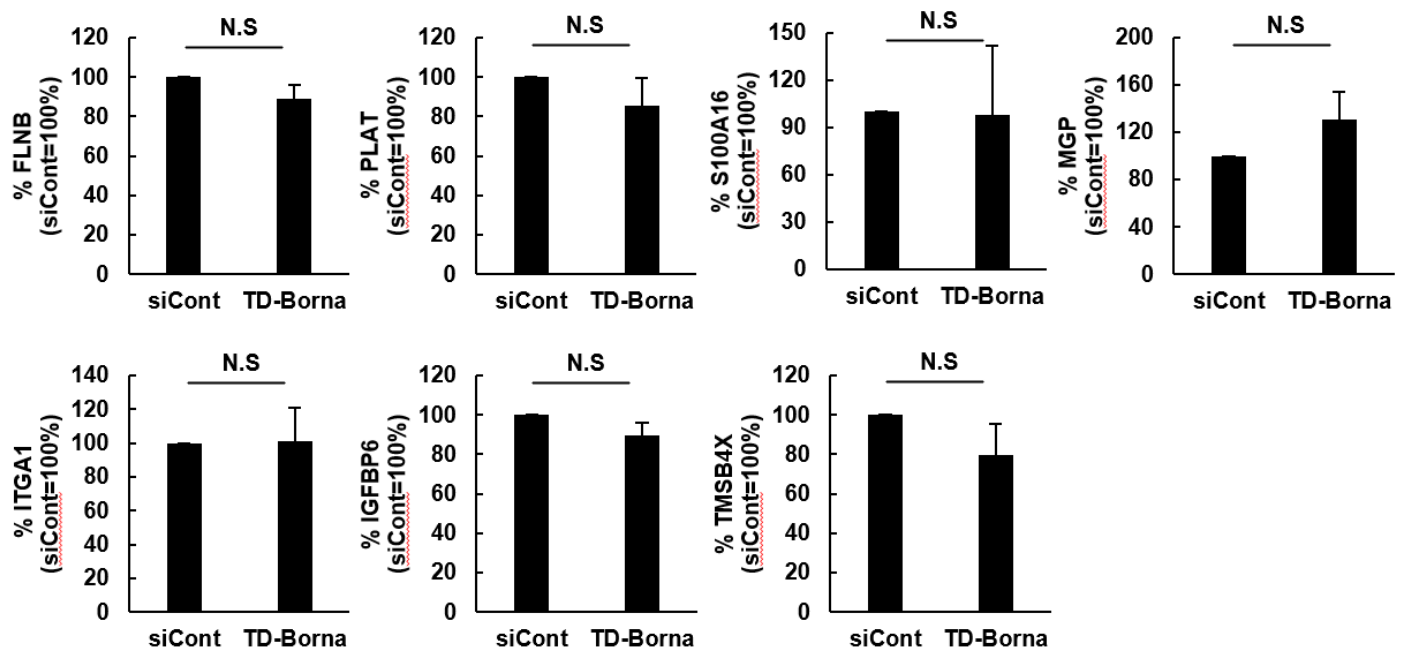

**Figure S3.** Effect of TD-Borna on BoDV-1-related transcriptomic changes in differentiated SH-SY5Y/BoDV cells. RA-treated SH-SY5Y/BoDV cells were treated with the scrambled siRNA (siCont) or TD-Borna. The mRNA amounts of differentiation-related genes that were downregulated by BoDV-1 infection were evaluated by real-time RT-qPCR. We calculated the expression of each gene by the DDCt method. The expression of each gene was normalized with that of the *GAPDH* gene in each condition. Values are expressed as the mean percentage + SEM of at least three independent experiments. N.S, non-significant.
